# Supplementary material for: A Retrospective Approach to Testing the DNA Barcoding Method
Source: PubMed Central journal article supplement (PMC3823873; doi:10.1371/journal.pone.0077882), 2013-11-11
Supplement: pone.0077882.s001.pdf [file pone.0077882.s001.pdf]

**Table S1. Comparison of the current taxonomy for New Zealand skinks with that recognised in 1977, prior to the implementation of modern molecular techniques.** Evidence on which the current taxonomy is based: 1: allozymes, 2: mitochondrial DNA sequence data, 3: nuclear DNA sequence data, 4: morphological data, 5: proposed taxonomic change yet to be confirmed.

| Taxonomy- 1977               | Taxonomy- Current                                     | Evidence | Reference                                    |
|------------------------------|-------------------------------------------------------|----------|----------------------------------------------|
| <i>Cyclodina aenea</i>       | <i>Oligosoma aeneum</i>                               | 2-4      | Chapple et al. (2008a,b, 2009)               |
|                              | <i>Oligosoma hardyi</i>                               | 2-4      | Chapple et al. (2008a,b, 2009)               |
|                              | <i>Oligosoma levidensum</i>                           | 2,4      | Chapple et al. (2008a,b)                     |
| <i>Cyclodina alani</i>       | <i>Oligosoma alani</i>                                | 2-4      | Chapple et al. (2008b, 2009)                 |
| <i>Cyclodina macgregori</i>  | <i>Oligosoma macgregori</i>                           | 2-4      | Chapple et al. (2008b, 2009)                 |
| <i>Cyclodina oliveri</i>     | <i>Oligosoma oliveri</i>                              | 1-4      | Vos (1988), Chapple et al. (2008c, 2009)     |
|                              | <i>Oligosoma townsi</i>                               | 1-4      | Vos (1988), Chapple et al. (2008c, 2009)     |
| <i>Cyclodina ornata</i>      | <i>Oligosoma ornatum</i>                              | 2-4      | Chapple et al. (2008b, 2009)                 |
|                              | <i>Oligosoma</i> aff. <i>ornatum</i> ‘Poor Knights’   | 2-4      | Chapple et al. (2008b, 2009)                 |
| <i>Cyclodina whitakeri</i>   | <i>Oligosoma whitakeri</i>                            | 2-4      | Chapple et al. (2008b, 2009)                 |
| <i>Leiopisma acrinasum</i>   | <i>Oligosoma acrinasum</i>                            | 2-4      | Chapple et al. (2009)                        |
| <i>Leiopisma chloronoton</i> | <i>Oligosoma chloronoton</i>                          | 2-4      | Greaves et al. (2007), Chapple et al. (2009) |
|                              | <i>Oligosoma</i> aff. <i>chloronoton</i> ‘West Otago’ | 2-3      | Greaves et al. (2007), Chapple et al. (2009) |
| <i>Leiopisma fallai</i>      | <i>Oligosoma fallai</i>                               | 2-4      | Chapple et al. (2009)                        |

|                                         |                                                                |     |                                                                                                      |
|-----------------------------------------|----------------------------------------------------------------|-----|------------------------------------------------------------------------------------------------------|
| <i>Leiopisma grande</i>                 | <i>Oligosoma grande</i>                                        | 1-4 | Patterson (1997), Berry & Gleeson (2005), Chapple et al. (2009)                                      |
| <i>Leiopisma homalonotum</i>            | <i>Oligosoma homalonotum</i>                                   | 2-4 | Chapple et al. (2009)                                                                                |
| <i>Leiopisma infrapunctatum</i>         | <i>Oligosoma infrapunctatum</i>                                | 2-4 | Greaves et al. (2008), Chapple et al. (2009)                                                         |
|                                         | <i>Oligosoma</i> aff. <i>infrapunctatum</i>                    | 2-3 | Greaves et al. (2008), Chapple et al. (2009)                                                         |
|                                         | ‘Chesterfield’                                                 |     |                                                                                                      |
| <i>Leiopisma lineocellatum</i>          | <i>Oligosoma</i> aff. <i>infrapunctatum</i>                    | 2-3 | Greaves et al. (2008), Chapple et al. (2009)                                                         |
|                                         | ‘Southern North Island’                                        |     |                                                                                                      |
|                                         | <i>Oligosoma lineocellatum</i>                                 | 2-4 | Greaves et al. (2007), Chapple et al. (2009)                                                         |
|                                         | <i>Oligosoma</i> aff. <i>lineocellatum</i> ‘South Marlborough’ | 2   | Greaves et al. (2007)                                                                                |
|                                         | <i>Oligosoma</i> aff. <i>lineocellatum</i>                     | 2-3 | Greaves et al. (2007), Chapple et al. (2009)                                                         |
| <i>Leiopisma moco</i>                   | ‘Mackenzie Basin’                                              |     |                                                                                                      |
|                                         | <i>Oligosoma</i> aff. <i>lineocellatum</i>                     | 2   | Greaves et al. (2007)                                                                                |
|                                         | ‘Central Canterbury’                                           |     |                                                                                                      |
| <i>Leiopisma nigriplantare</i>          | <i>Oligosoma moco</i>                                          | 2-4 | Hare et al. (2008), Chapple et al. (2009)                                                            |
| <i>nigriplantare</i>                    | <i>Oligosoma nigriplantare</i>                                 | 2-4 | Liggins et al. (2008a), Chapple et al. (2009)                                                        |
| <i>Leiopisma nigriplantare maccanni</i> | <i>Oligosoma polychroma</i>                                    | 1-4 | Daugherty et al. (1990), Patterson & Daugherty (1990), Liggins et al. (2008b), Chapple et al. (2009) |
|                                         | <i>Oligosoma</i> aff. <i>polychroma</i> ‘Clade 2’              | 2   | Liggins et al. (2008b)                                                                               |
|                                         | <i>Oligosoma</i> aff. <i>polychroma</i> ‘Clade 3’              | 2   | Liggins et al. (2008b)                                                                               |
|                                         | <i>Oligosoma</i> aff. <i>polychroma</i> ‘Clade 4’              | 2   | Liggins et al. (2008b)                                                                               |
|                                         | <i>Oligosoma</i> aff. <i>polychroma</i> ‘Clade 5’              | 2   | Liggins et al. (2008b), Chapple et al. (2009)                                                        |

|                                           |                                                                   |     |                                                                                                     |
|-------------------------------------------|-------------------------------------------------------------------|-----|-----------------------------------------------------------------------------------------------------|
|                                           | <i>Oligosoma inconspicuum</i>                                     | 1-4 | Daugherty et al. (1990), Patterson & Daugherty (1990), Chapple et al. (2009, 2011)                  |
|                                           | <i>Oligosoma burganae</i>                                         | 2,4 | Chapple et al. (2011)                                                                               |
|                                           | <i>Oligosoma toka</i>                                             | 2,4 | Chapple et al. (2011)                                                                               |
|                                           | <i>Oligosoma repens</i>                                           | 2,4 | Chapple et al. (2011)                                                                               |
|                                           | <i>Oligosoma longipes</i>                                         | 1-4 | Patterson (1997), Chapple et al. (2009)                                                             |
|                                           | <i>Oligosoma</i> aff. <i>longipes</i> 'Southern'                  | 2-3 | Chapple et al. (2009)                                                                               |
|                                           | <i>Oligosoma maccanni</i>                                         | 1-4 | Daugherty et al. (1990), Patterson & Daugherty (1990), O'Neill et al. (2008), Chapple et al. (2009) |
|                                           | <i>Oligosoma notosaurus</i>                                       | 1-4 | Daugherty et al. (1990), Patterson & Daugherty (1990), Chapple et al. (2009, 2011)                  |
|                                           | <i>Oligosoma stenotis</i>                                         | 1-4 | Patterson & Daugherty (1994), Chapple et al. (2009)                                                 |
|                                           | <i>Oligosoma microlepis</i>                                       | 1-4 | Daugherty et al. (1990), Patterson & Daugherty (1990), Hare et al. (2008), Chapple et al. (2009)    |
| <i>Leiopisma otagense</i> form otagense   | <i>Oligosoma otagense</i>                                         | 1-4 | Patterson (1997), Chapple et al. (2009, 2012)                                                       |
| <i>Leiopisma otagense</i> form waimatense | <i>Oligosoma waimatense</i>                                       | 1-4 | Patterson (1997), Chapple et al. (2009, 2012)                                                       |
| <i>Leiopisma smithi</i>                   | <i>Oligosoma smithi</i>                                           | 2-4 | Hare et al. (2008), Chapple et al. (2009)                                                           |
|                                           | <i>Oligosoma smithi</i> 'Three Kings, Te Pahi, Western Northland' | 2   | Hare et al. (2008), Chapple et al. (2009)                                                           |
| <i>Leiopisma striatum</i>                 | <i>Oligosoma striatum</i>                                         | 2-4 | Chapple et al. (2009)                                                                               |
| <i>Leiopisma suteri</i>                   | <i>Oligosoma suteri</i>                                           | 2-4 | Hare et al. (2008), Chapple et al. (2009)                                                           |

|                               |                                                    |     |                                                   |
|-------------------------------|----------------------------------------------------|-----|---------------------------------------------------|
| <i>Leiopisma zelandicum</i>   | <i>Oligosoma zelandicum</i>                        | 2-4 | O'Neill et al. (2008), Chapple et al. (2009)      |
| <i>Leiopisma lichenigerum</i> | <i>Oligosoma lichenigerum</i>                      | 2-3 | Chapple et al. (2009)                             |
| Not discovered                | <i>Oligosoma judgei</i>                            | 2,4 | Patterson & Bell (2009)                           |
|                               | <i>Oligosoma pikitanga</i>                         | 2-4 | Bell & Patterson (2008), Chapple et al. (2009)    |
|                               | <i>Oligosoma taumakae</i>                          | 1-4 | Chapple & Patterson (2007), Chapple et al. (2009) |
|                               | <i>Oligosoma tekakahu</i>                          | 2,4 | Chapple et al. (2011)                             |
|                               | <i>Oligosoma</i> aff. <i>longipes</i> 'Rangitata'  | 2-4 | Chapple et al. (2009)                             |
|                               | <i>Oligosoma</i> aff. <i>inconspicuuum</i> 'Okuru' | 4-5 | Chapple et al. (2011)                             |
|                               | <i>Oligosoma</i> 'Whirinaki'                       | 2,4 | Hitchmough et al. (2010)                          |

## References

- Bell TP, Patterson GB, 2008. A rare alpine skink *Oligosoma pikitanga* n. sp. (Reptilia: Scincidae) from Llawrenny Peaks, Fiordland, New Zealand. *Zootaxa* 1882:57-68.
- Berry O, Gleeson DM, 2005. Distinguishing historical fragmentation from a recent population decline- shrinking or pre-shrunk skink from New Zealand? *Biological Conservation* 123:197-210.
- Chapple DG, Patterson GB, 2007. A new skink species (*Oligosoma taumakae* sp. nov.; Reptilia: Scincidae) from the Open Bay Islands, New Zealand. *New Zealand Journal of Zoology* 34:347-357.
- Chapple DG, Patterson GB, Bell T, Daugherty CH, 2008a. Taxonomic revision of the New Zealand Copper Skink (*Cyclodina aenea*; Squamata: Scincidae) species complex, with description of two new species. *Journal of Herpetology* 42:437-452.
- Chapple DG, Daugherty CH, Ritchie PA, 2008b. Comparative phylogeography reveals pre-decline population structure of New Zealand *Cyclodina* (Reptilia: Scincidae) species. *Biological Journal of the Linnean Society* 95:388-408.
- Chapple DG, Patterson GB, Gleeson DM, Daugherty CH, Ritchie PA, 2008c. Taxonomic revision of the marbled skink (*Cyclodina oliveri*, Reptilia: Scincidae) species complex, with a description of a new species. *New Zealand Journal of Zoology* 35:129-146.
- Chapple DG, Ritchie PA, Daugherty CH, 2009. Origin, diversification and systematics of the New Zealand skink fauna (Reptilia: Scincidae). *Molecular Phylogenetics and Evolution* 52:470-487.
- Chapple DG, Bell TP, Chapple SNJ, Miller KA, Daugherty CH, Patterson GB, 2011. Phylogeography and taxonomic revision of the New Zealand cryptic skink (*Oligosoma inconspicuuum*; Reptilia: Scincidae) species complex. *Zootaxa* 2782:1-33.
- Chapple DG, Birkett A, Miller KA, Daugherty CH, Gleeson DM, 2012. Phylogeography of the endangered Otago skink, *Oligosoma ottagense*: population structure, hybridisation and genetic diversity in captive populations. *PLoS ONE* 7:e34599.

- Daugherty CH, Patterson GB, Thorn CJ, French DC, 1990. Differentiation of the members of the New Zealand *Leiopisma nigriplantare* species complex (Lacertilia: Scincidae). *Herpetological Monographs* 4:61-76.
- Greaves SNJ, Chapple DG, Gleeson DM, Daugherty CH, Ritchie PA, 2007. Phylogeography of the spotted skink (*Oligosoma lineoocellatum*) and green skink (*O. chloronoton*) species complex (Lacertilia: Scincidae) in New Zealand reveals pre-Pleistocene divergence. *Molecular Phylogenetics and Evolution* 45:729-739.
- Greaves SNJ, Chapple DG, Daugherty CH, Gleeson DM, Ritchie PA, 2008. Genetic divergences pre-date Pleistocene glacial cycles in the New Zealand speckled skink, *Oligosoma infrapunctatum*. *Journal of Biogeography* 35:853-864.
- Hare KM, Daugherty CH, Chapple DG, 2008. Comparative phylogeography of three skink species (*Oligosoma moco*, *O. smithi* and *O. suteri*; Reptilia: Scincidae) in northeastern New Zealand. *Molecular Phylogenetics and Evolution* 46:303-315.
- Hitchmough RA, Hoare JM, Jamieson H, Newman DG, Tocher MD, Anderson PJ, Lettink M, Whitaker AH, 2010. Conservation status of New Zealand reptiles, 2009. *New Zealand Journal of Zoology* 37:203-224.
- Liggins L, Chapple DG, Daugherty CH, Ritchie PA, 2008a. Origin and post-colonization evolution of the Chatham Islands skink (*Oligosoma nigriplantare nigriplantare*). *Molecular Ecology* 17:3290-3305.
- Liggins L, Chapple DG, Daugherty CH, Ritchie PA, 2008b. A SINE of restricted gene flow across the Alpine Fault: phylogeography of the New Zealand common skink (*Oligosoma nigriplantare polychroma*). *Molecular Ecology* 17:3668-3683.
- O'Neill SB, Chapple DG, Daugherty CH, Ritchie PA, 2008. Phylogeography of two New Zealand lizards: McCann's skink (*Oligosoma maccanni*) and the brown skink (*O. zelandicum*). *Molecular Phylogenetics and Evolution* 48:1168-1177.
- Patterson GB, 1997. South Island skinks of the genus *Oligosoma*: description of *O. longipes* n. sp with redescription of *O. otagenase* (McCann) and *O. waimatense* (McCann). *Journal of the Royal Society of New Zealand* 27:439-450.
- Patterson GB, Bell TP, 2009. The Barrier skink *Oligosoma judgei* n. sp. (Reptilia: Scincidae) from the Darran and Takitimu Mountains, South Island, New Zealand. *Zootaxa* 2271:43-56.
- Patterson GB, Daugherty CH, 1990. Four new species and one new subspecies of skinks, genus *Leiopisma* (Reptilia: Lacertilia: Scincidae) from New Zealand. *Journal of the Royal Society of New Zealand* 20:65-84.
- Patterson GB, Daugherty CH, 1994. *Leiopisma stenotis*, n. sp. (Reptilia: Lacertilia: Scincidae) from Stewart Island, New Zealand. *Journal of the Royal Society of New Zealand* 20:65-84.
- Vos ME, 1988. A biochemical, morphological and phylogenetic review of the genus *Cyclodina*. Masters Thesis, Victoria University of Wellington, New Zealand.
