# Supplementary material for: A Retrospective Approach to Testing the DNA Barcoding Method
Source: PubMed Central journal article supplement (PMC3823873; doi:10.1371/journal.pone.0077882), 2013-11-11
Supplement: pone.0077882.s002.pdf [file pone.0077882.s002.pdf]

**Table S2. Locality data, museum voucher specimen information, and GenBank accession numbers for the New Zealand skink samples used in this study.** Samples with CD or FT codes were obtained from the National Frozen Tissue Collection (NFTC) housed at Victoria University of Wellington, New Zealand (the associated voucher specimens are now housed at Te Papa). Samples with RE codes were obtained from Te Papa, National Museum of New Zealand, Wellington (S codes refer to specimens from the former Ecology Division collection, now housed at Te Papa). Samples with ABTC (Australian Biological Tissue Collection) codes were obtained from the South Australian Museum. Samples with NR and EBU codes were obtained from the Australian Museum. Asterisks indicate the exemplar specimens.

| Species             | Sample Code | Museum Voucher | Collection Locality                        | GenBank Accession No. |
|---------------------|-------------|----------------|--------------------------------------------|-----------------------|
| <i>O. acrinasum</i> | OAC1        | CD826          | Fiordland                                  | KC349640              |
|                     | OAC3*       | RE1839         | Five Fingers Peninsula, Fiordland          | KC349641              |
| <i>O. aeneum</i>    | CAE1        | FT171          | Korapuki Island, Mercury Islands           | KC349568              |
|                     | CAE2*       | FT5253         | Pukerua Bay                                | KC349571              |
|                     | CAE4        | FT184          | Pukerua Bay                                | KC349573              |
|                     | CAE6        | FT189          | Devonport, Auckland                        | KC349575              |
|                     | CAE7        | FT190          | Devonport, Auckland                        | KC349576              |
|                     | CAE8        | FT611          | Red Mercury Island, Mercury Islands        | KC349577              |
|                     | CAE11       | CD1962         | Matiu-Somes Island                         | KC349569              |
|                     | CAE12       | FT6535         | Seatoun                                    | KC349570              |
|                     | CAE25       | RE4610 (S970)  | Mana Island                                | KC349572              |
|                     | CAE43       | RE4876 (S1239) | Red Rock, Karaka Bay, Great Barrier Island | KC349574              |

---

|                                        |        |                |                                     |          |
|----------------------------------------|--------|----------------|-------------------------------------|----------|
| <i>O. alani</i>                        | CAL1*  | FT145          | Green Island, Mercury Islands       | KC349579 |
|                                        | CAL2   | FT3016         | Matapia Island                      | KC349580 |
|                                        | CAL3   | FT144          | Green Island, Mercury Islands       | KC349581 |
|                                        | CAL4   | FT146          | Middle Island, Mercury Islands      | KC349582 |
|                                        | CAL5   | FT147          | Middle Island, Mercury Islands      | KC349583 |
|                                        | CAL7   | RE4660 (S1021) | Castle Rock, 8 miles E of Whitianga | KC349584 |
| <i>O. chloronoton</i>                  | OCH1   | FT555          | Codfish Island, Stewart Island      | KC349644 |
|                                        | OCH9   | CD382          | Emerald Creek                       | KC349651 |
|                                        | OCH10  | CD424          | Big Island                          | KC349645 |
|                                        | OCH11* | CD1280         | Tiwai Point                         | KC349646 |
|                                        | OCH18  | FT3632         | Catlins                             | KC349649 |
| <i>O. aff. choronoton</i> 'West Otago' | OCH2*  | CD847          | Tara Hills, Omarama                 | KC349650 |
|                                        | OCH12  | CD1294         | Lindis Pass                         | KC349647 |
|                                        | OCH13  | CD1904         | Gorge Burn, Eyre Mountains          | KC349648 |
| <i>O. fallai</i>                       | OFA1*  | FT597          | Great Island, Three Kings Islands   | KC349652 |
|                                        | OFA2   | FT598          | Great Island, Three Kings Islands   | KC349653 |
| <i>O. grande</i>                       | OGR1*  | CD1055         | Central Otago                       | KC349654 |
| <i>O. hardyi</i>                       | PKS1*  | CD1036         | Aorangi Island, Poor Knights Island | KC349848 |
|                                        | PKS2   | CD1037         | Aorangi Island, Poor Knights Island | KC349849 |
| <i>O. homalonotum</i>                  | OHO1*  | FT6290         | Shoal Bay, Great Barrier Island     | KC349655 |
|                                        | OHO2   | FT6291         | Tryphena, Great Barrier Island      | KC349656 |
| <i>O. inconspicuum</i>                 | OIN1*  | CD1101         | Gorge Burn, Eyre Mountains          | KC349691 |
|                                        | OIN2   | CD421          | Macraes Flat                        | KC349692 |

---

---

|                          |       |        |                                             |          |
|--------------------------|-------|--------|---------------------------------------------|----------|
|                          | OIN3  | —      | Macraes Flat                                | KC349693 |
|                          | BBS1  | FT3783 | Awarua Point, Big Bay, Westland             | KC349552 |
|                          | BBS2  | FT3786 | Mouth of Mackenzie River, Big Bay, Westland | KC349560 |
|                          | BBS3  | FT3784 | Awarua Point, Big Bay, Westland             | KC349562 |
|                          | BBS4  | FT3785 | Awarua Point, Big Bay, Westland             | KC349563 |
|                          | BBS5  | FT3787 | Mouth of Mackenzie River, Big Bay, Westland | KC349564 |
|                          | BBS6  | FT3788 | Mouth of Mackenzie River, Big Bay, Westland | KC349565 |
|                          | BBS7  | FT3789 | mid-point Mckenzie River, Big Bay, Westland | KC349566 |
|                          | BBS9  | FT3791 | mid-point Mckenzie River, Big Bay, Westland | KC349567 |
|                          | BBS10 | FT3792 | Big Bay, Westland                           | KC349553 |
|                          | BBS11 | FT3793 | Big Bay, Westland                           | KC349554 |
|                          | BBS14 | FT3032 | Awarua Point, Big Bay, Westland             | KC349555 |
|                          | BBS15 | FT3033 | Awarua Point, Big Bay, Westland             | KC349556 |
|                          | BBS17 | FT3813 | Barn Bay, West Coast                        | KC349557 |
|                          | BBS18 | FT7652 | Cascade Plateau                             | KC349558 |
|                          | BBS19 | FT7653 | Cascade Plateau                             | KC349559 |
|                          | BBS20 | FT7654 | Cascade Plateau                             | KC349561 |
| <i>O. infrapunctatum</i> | OIF1* | CD545  | Stephens Island                             | KC349657 |
|                          | OIF2  | FT3749 | Cobden Beach                                | KC349666 |
|                          | OIF5  | FT6272 | Denniston                                   | KC349685 |
|                          | OIF10 | CD531  | Stephens Island                             | KC349658 |
|                          | OIF11 | FT3395 | Granity                                     | KC349659 |
|                          | OIF12 | FT3481 | Hokitika                                    | KC349660 |

---

---

|                               |       |         |                                  |          |
|-------------------------------|-------|---------|----------------------------------|----------|
|                               | OIF15 | FT3758  | Birchfield Beach                 | KC349662 |
|                               | OIF17 | FT6270  | Brown Hill, Heaphy Track         | KC349664 |
|                               | OIF19 | RE 5235 | Hokitika                         | KC349665 |
|                               | OIF22 | RE 5247 | Rotorua                          | KC349667 |
|                               | OIF25 | FT3023  | Whale Island                     | KC349669 |
|                               | OIF26 | FT3024  | Whale Island                     | KC349670 |
|                               | OIF28 | FT3740  | Hokitika Cemetery                | KC349671 |
|                               | OIF29 | FT3741  | Hokitika Cemetery                | KC349672 |
|                               | OIF30 | FT3742  | Hokitika Cemetery                | KC349674 |
|                               | OIF31 | FT3809  | Orowaitai Lagoon                 | KC349675 |
|                               | OIF33 | FT3476  | Hokitika                         | KC349676 |
|                               | OIF34 | FT3767  | Oparara Rd, Karamea              | KC349677 |
|                               | OIF35 | FT3768  | Oparara Rd, Karamea              | KC349678 |
|                               | OIF39 | FT3795  | Costello Hill, Pakahi Charleston | KC349681 |
|                               | OIF40 | FT3799  | Kaniere Rd, Hokitika             | KC349683 |
|                               | OIF41 | FT3800  | Kaniere Rd, Hokitika             | KC349684 |
|                               | PAP1  | FT3815  | Paparoa Ranges                   | KC349847 |
| <i>O. aff. infrapunctatum</i> |       |         |                                  | KC349673 |
| 'Chesterfield'                | OIF3* | FT3214  | Chesterfield                     |          |
|                               | OIF4  | FT3215  | Chesterfield                     | KC349682 |
|                               | OIF13 | FT3745  | Alborn Mine                      | KC349661 |
|                               | OIF37 | FT3770  | Chesterfield                     | KC349679 |
|                               | OIF38 | FT3771  | Chesterfield                     | KC349680 |

---

---

|                                                       |       |        |                                        |          |
|-------------------------------------------------------|-------|--------|----------------------------------------|----------|
| <i>O. aff. infrapunctatum</i> 'Southern North Island' | OIF6* | —      | Waiinu Beach                           | KC349687 |
|                                                       | OIF7  | —      | Waiinu Beach                           | KC349688 |
|                                                       | OIF8  | —      | Waiinu Beach                           | KC349689 |
|                                                       | OIF9  | —      | Waiinu Beach                           | KC349690 |
|                                                       | OIF16 | FT6269 | Waiinu Beach                           | KC349663 |
|                                                       | OIF24 | FT3004 | Westport                               | KC349668 |
|                                                       | OIF57 | —      | Castlecliff                            | KC349686 |
| <i>O. levidensum</i>                                  | CAE9* | FT3729 | Kauri Bush, Pandora Track, Northland   | KC349578 |
| <i>O. lineocellatum</i>                               | OLI6  | CD430  | Ward Island                            | KC349705 |
|                                                       | OLI7  | CD431  | Ward Island                            | KC349706 |
|                                                       | OLI8* | CD463  | Cape Turakirae                         | KC349707 |
|                                                       | OLI19 | —      | Lake Station                           | KC349699 |
|                                                       | OLI28 | CD601  | Stephens Island                        | KC349701 |
|                                                       | OLI29 | CD797  | Aniseed Valley                         | KC349702 |
|                                                       | OLI30 | FT239  | North Brother Island                   | KC349703 |
| <i>O. aff. lineocellatum</i> 'South Marlborough'      | OLI1* | FT302  | Jack Taylor's Farm, Ward, South Island | KC349694 |
| <i>O. aff. lineocellatum</i> 'Mackenzie Basin'        | OLI2* | FT3112 | Tekapo                                 | KC349700 |
|                                                       | OLI10 | CD1217 | Tekapo                                 | KC349695 |
|                                                       | OLI14 | FT3211 | Tekapo                                 | KC349697 |
|                                                       | OLI15 | FT3212 | Tekapo                                 | KC349698 |

---

---

|                                                   |        |        |                                                |          |
|---------------------------------------------------|--------|--------|------------------------------------------------|----------|
| <i>O. aff. lineocellatum</i> ‘Central Canterbury’ | OLI4   | —      | Birdlings Flat                                 | KC349704 |
|                                                   | OLI11* | CD1064 | Ashburton                                      | KC349696 |
| <i>O. longipes</i>                                | OLO1*  | FT161  | Clarence River, Lake Tennyson                  | KC349708 |
|                                                   | OLO4   | FT160  | Clarence River, Lake Tennyson                  | KC349711 |
| <i>O. aff. longipes</i> ‘Southern’                | OLO2   | —      | Mt Harper                                      | KC349709 |
|                                                   | OLO3   | —      | Mt Harper                                      | KC349710 |
|                                                   | OLO6*  | CD1039 | Mt Hay, Lake Tekapo                            | KC349712 |
|                                                   | OLO7   | CD803  | Mount Hay Station, Edwards Stream, Lake Tekapo | KC349713 |
| <i>O. aff. longipes</i> ‘Rangitata’               | RAN1*  | —      | Mt Harper                                      | KC349850 |
|                                                   | RAN2   | —      | Mt Harper                                      | KC349851 |
| <i>O. maccanni</i>                                | OMA1   | CD930  | Nevis Range, central Otago                     | KC349714 |
|                                                   | OMA2*  | CD1261 | Puketoi, Otago                                 | KC349722 |
|                                                   | OMA3   | FT3213 | Garston, Southland/Westland                    | KC349732 |
|                                                   | OMA4   | FT3039 | Garston, Southland/Westland                    | KC349733 |
|                                                   | OMA5   | —      | Alexandra, central Otago                       | KC349734 |
|                                                   | OMA6   | —      | Alexandra, central Otago                       | KC349735 |
|                                                   | OMA7   | —      | Macraes Flat, Otago                            | KC349736 |
|                                                   | OMA8   | —      | Macraes Flat, Otago                            | KC349737 |
|                                                   | OMA9   | CD956  | Edwards Creek, Canterbury                      | KC349738 |
|                                                   | OMA10  | CD804  | Mount Hay Station, Canterbury                  | KC349715 |
|                                                   | OMA11  | CD615  | Birdlings Flat, Canterbury                     | KC349716 |
|                                                   | OMA12  | CD1254 | Gordon Peak, Knobby Range, Otago               | KC349717 |

---

---

|                      |       |        |                                           |          |
|----------------------|-------|--------|-------------------------------------------|----------|
|                      | OMA13 | CD1119 | Otematata, Canterbury                     | KC349718 |
|                      | OMA14 | CD1106 | Gorge Burn, Eyre Mountains, Southland     | KC349719 |
|                      | OMA15 | CD778  | Burgan Stream Hut, Otago                  | KC349720 |
|                      | OMA16 | CD1255 | Hills Creek, Otago                        | KC349721 |
|                      | OMA20 | CD635  | Mount John Station, Canterbury            | KC349723 |
|                      | OMA21 | CD634  | Simons Hill, Canterbury                   | KC349724 |
|                      | OMA22 | CD627  | Mount Mary, Canterbury                    | KC349725 |
|                      | OMA23 | CD626  | Taieri Ridge, Otago                       | KC349726 |
|                      | OMA24 | CD567  | Conroys Dam, Otago                        | KC349727 |
|                      | OMA25 | CD428  | Remarkables, Otago                        | KC349728 |
|                      | OMA26 | CD426  | 10 km North of Millers Flat, Otago        | KC349729 |
|                      | OMA27 | CD425  | Frankton, Otago                           | KC349730 |
|                      | OMA29 | CD10   | Hokonui Hills, Southland                  | KC349731 |
|                      | ONP30 | CD1293 | Lindis Pass                               | KC349765 |
|                      | ONP38 | CD1044 | Mt Hay, Lake Tekapo                       | KC349772 |
| <i>O. macgregori</i> | CMA1* | FT3    | Mana Island                               | KC349585 |
|                      | CMA2  | FT1095 | Mana Island                               | KC349586 |
| <i>O. microlepis</i> | OMI1* | CD1299 | Taihape                                   | KC349739 |
|                      | OMI2  | FT3730 | Mokimokonui River, Southern Urewera       | KC349740 |
| <i>O. moco</i>       | OMO1  | FT156  | Stanley Island, Mercury Islands           | KC349741 |
|                      | OMO2  | CD1031 | Aorangi Island, Poor Knights Islands      | KC349742 |
|                      | OMO3  | CD848  | Lady Alice Island, Hen & Chickens Islands | KC349743 |
|                      | OMO4* | FT167  | Korapuki Island, Mercury Islands          | KC349744 |

---

---

|                         |       |                |                                        |          |
|-------------------------|-------|----------------|----------------------------------------|----------|
|                         | OMO5  | FT296          | Middle Island, Mercury Islands         | KC349745 |
|                         | OMO6  | FT2903         | Cuvier Island                          | KC349746 |
|                         | OMO7  | RE5161 (S1526) | Whangapoua Creek, Great Barrier Island | KC349747 |
| <i>O. nigriplantare</i> | ONN8* | FT3292         | Middle Sister Island, Chatham Islands  | KC349748 |
|                         | ONN9  | FT3293         | Middle Sister Island, Chatham Islands  | KC349749 |
| <i>O. notosaurus</i>    | ONT1  | FT575          | Magog, Stewart Island                  | KC349795 |
|                         | ONT2* | CD1089         | Arena Ridge, Stewart Island            | KC349796 |
| <i>O. oliveri</i>       | COL1* | CD1034         | Aorangi Island, Poor Knights Islands   | KC349587 |
|                         | COL2  | CD1035         | Aorangi Island, Poor Knights Islands   | KC349593 |
|                         | COL3  | FT137          | Green Island, Mercury Islands          | KC349594 |
|                         | COL4  | FT572          | Ruamahuanui, Aldermen Islands          | KC349595 |
|                         | COL6  | CD819          | Middle Island, Mercury Islands         | KC349596 |
|                         | COL7  | CD820          | Middle Island, Mercury Islands         | KC349597 |
|                         | COL8  | CD821          | Middle Island, Mercury Islands         | KC349598 |
|                         | COL9  | FT138          | Green Island, Mercury Islands          | KC349599 |
|                         | COL10 | FT139          | Green Island, Mercury Islands          | KC349588 |
|                         | COL11 | FT142          | Middle Island, Mercury Islands         | KC349589 |
|                         | COL12 | FT143          | Middle Island, Mercury Islands         | KC349590 |
| <i>O. ornatum</i>       | COR1  | FT188          | Devonport, Auckland                    | KC349600 |
|                         | COR2* | FT3733         | Botanic Gardens, Wellington            | KC349602 |
|                         | COR4  | FT583          | Hen Island, Hen & Chickens             | KC349604 |
|                         | COR5  | FT594          | Lady Alice Island, Hen & Chickens      | KC349605 |
|                         | COR6  | FT3113         | Matapia Island                         | KC349606 |

---



---

|                                               |        |                  |                                          |          |
|-----------------------------------------------|--------|------------------|------------------------------------------|----------|
|                                               | COR15  | RE4732 (S1093)   | Kapiti Island                            | KC349601 |
| <i>O. aff. ornatum</i> 'Poor Knights Islands' | COR28* | RE1626           | Aorangi Island, Poor Knights Island      | KC349603 |
| <i>O. otagense</i>                            | OOT2*  | —                | Macraes Flat                             | KC349800 |
|                                               | OOT11  | —                | Alistairs Gully, Macraes Flat            | KC349797 |
|                                               | OOT12  | —                | Lindis Pass                              | KC349798 |
|                                               | OOT13  | —                | Lindis Pass                              | KC349799 |
| <i>O. pikitanga</i>                           | SVS1*  | RE5315 (FT7648)  | Sinbad Gully, Llawrenny Peaks, Fiordland | KC349852 |
| <i>O. polychroma</i>                          | ONP1*  | FT5252           | Pukerua Bay, Wellington                  | KC349750 |
|                                               | ONP13  | CD792            | Aniseed Valley, Canterbury               | KC349754 |
|                                               | ONP31  | FT533            | Makara, Wellington                       | KC349766 |
|                                               | ONP33  | RE.5368 (FT3774) | Mania Valley, Nelson                     | KC349767 |
|                                               | ONP37  | CD496            | Motueka, Nelson                          | KC349771 |
|                                               | ONP40  | CD1065           | Mitchell Bush, Manawatu-Wanganui         | KC349775 |
|                                               | ONP45  | FT6486           | Palmer Head, Wellington                  | KC349778 |
|                                               | ONP50  | CD1956           | Matiu-Somes Island, Wellington           | KC349783 |
|                                               | ONP51  | FT3732           | Springs Junction, West Coast             | KC349784 |
|                                               | ONP52  | FT3000           | St Amaud, Nelson                         | KC349785 |
|                                               | ONP53  | CD110            | Stephens Island, Nelson                  | KC349786 |
|                                               | ONP54  | FT3015           | Tahuranui, Nelson                        | KC349787 |
|                                               | ONP60  | FT3693           | Waipakihi River, Manawatu-Wanganui       | KC349790 |
|                                               | ONP61  | FT300            | Wairau River Mouth, Marlborough          | KC349791 |
|                                               | ONP62  | FT3694           | Wakemans Clearing, Manawatu-Wanganui     | KC349792 |

---

---

|                                     |        |                  |                                |          |
|-------------------------------------|--------|------------------|--------------------------------|----------|
|                                     | ONP63  | CD265            | Ward Island, Wellington        | KC349793 |
|                                     | GVS1   | FT4796           | Kangaroo Creek, West Coast     | KC349620 |
|                                     | GVS2   | RE.5398 (FT3804) | Blaketown Beach, West Coast    | KC349621 |
|                                     | GVS3   | RE.5391 (FT3797) | Kangaroo Creek, West Coast     | KC349622 |
|                                     | GVS4   | RE.5399 (FT3805) | Blaketown Beach, West Coast    | KC349623 |
|                                     | GVS5   | RE.5400 (FT3806) | Blaketown Beach, West Coast    | KC349624 |
|                                     | GVS6   | RE.5501 (FT3807) | Blaketown Beach, West Coast    | KC349625 |
|                                     | GVS7   | RE.5502 (FT3808) | Blaketown Beach, West Coast    | KC349626 |
|                                     | GVS8   | RE.5392 (FT3798) | Mawheraiti Railway, West Coast | KC349627 |
| <i>O. aff. polychroma</i> ‘Clade 3’ | ONP15* | FT162            | Clarence River, Canterbury     | KC349756 |
| <i>O. aff. polychroma</i> ‘Clade 4’ | ONP27* | CD2024           | Lake Heron, Canterbury         | KC349762 |
|                                     | ONP29  | FT2996           | The Poplars, Canterbury        | KC349764 |
|                                     | ONP36  | FT2998           | Montrose, Canterbury           | KC349770 |
|                                     | ONP43  | RE.5369 (FT3775) | Oneone pakihi, West Coast      | KC349776 |
| <i>O. aff. polychroma</i> ‘Clade 5’ | ONP2   | CD618            | Birdlings Flat, Canterbury     | KC349760 |
|                                     | ONP4   | FT3219           | Tiwai Point, Southland         | KC349774 |
|                                     | ONP5   | FT3041           | Tiwai Point, Southland         | KC349782 |
|                                     | ONP6*  | —                | Macraes Flat, Otago            | KC349789 |
|                                     | ONP8   | FT3042           | Tiwai Point, Southland         | KC349794 |
|                                     | ONP10  | FT3040           | Tiwai Point, Southland         | KC349751 |
|                                     | ONP11  | FT3217           | Tiwai Point, Southland         | KC349752 |
|                                     | ONP12  | FT3218           | Tiwai Point, Southland         | KC349753 |
|                                     | ONP14  | FT298            | Banks Peninsula, Canterbury    | KC349755 |

---

---

|                  |       |        |                                        |          |
|------------------|-------|--------|----------------------------------------|----------|
|                  | ONP16 | FT550  | Codfish Island, Southland              | KC349757 |
|                  | ONP18 | CD950  | Edwards Creek, Canterbury              | KC349758 |
|                  | ONP19 | CD1113 | Eyre Mountains, Southland              | KC349759 |
|                  | ONP25 | FT538  | Lake Hawea, Otago                      | KC349761 |
|                  | ONP28 | CD1004 | Lake Pukaki, Canterbury                | KC349763 |
|                  | ONP34 | CD1256 | Manorburn, Southland                   | KC349768 |
|                  | ONP35 | FT614  | Stewart Island, Southland              | KC349769 |
|                  | ONP39 | CD1042 | Mount Mary, Canterbury                 | KC349773 |
|                  | ONP44 | CD1116 | Otematata, Otago                       | KC349777 |
|                  | ONP47 | CD1257 | Puketoi, Otago                         | KC349779 |
|                  | ONP48 | CD780  | Rock and Pillar Range, Otago           | KC349780 |
|                  | ONP49 | FT2067 | Wainono, Canterbury                    | KC349781 |
|                  | ONP58 | CD2126 | Twizel, Canterbury                     | KC349788 |
| <i>O. smithi</i> | OSM1  | FT166  | Middle Island, Mercury Islands         | KC349801 |
|                  | OSM2* | FT193  | Ocean Beach, Whangarei                 | KC349810 |
|                  | OSM4  | CD1029 | Sugarloaf Island, Poor Knights Islands | KC349815 |
|                  | OSM5  | CD1030 | Aorangi Island, Poor Knights Islands   | KC349816 |
|                  | OSM6  | CD1074 | Little Barrier Island                  | KC349817 |
|                  | OSM7  | FT140  | Green Island, Mercury Islands          | KC349818 |
|                  | OSM8  | FT154  | Stanley Island, Mercury Islands        | KC349819 |
|                  | OSM9  | FT168  | Korapuki Island, Mercury Islands       | KC349820 |
|                  | OSM10 | FT539  | Moutoki Island, Bay of Plenty          | KC349802 |
|                  | OSM12 | FT549  | Karewa Island, Bay of Plenty           | KC349803 |

---

---

|                                                                    |        |                |                                                               |          |
|--------------------------------------------------------------------|--------|----------------|---------------------------------------------------------------|----------|
|                                                                    | OSM13  | FT569          | Raumahuea-iti, Alderman Islands                               | KC349804 |
|                                                                    | OSM15  | FT3021         | Matakana Island, Bay of Plenty                                | KC349806 |
|                                                                    | OSM16  | FT3299         | Waiomu Stream mouth, north of Thames,<br>Coromandel Peninsula | KC349807 |
|                                                                    | OSM17  | RE5172 (S1537) | Tucks Bay, Coromandel Peninsula                               | KC349808 |
|                                                                    | OSM19  | RE5024 (S1387) | Marotiri Island, Hen & Chickens Islands                       | KC349809 |
|                                                                    | OSM32  | RE4822 (S1184) | Lizard Isle, Mokohinau Islands                                | KC349813 |
|                                                                    | OSM37  | RE4694 (S1055) | Hongiora, Alderman Islands                                    | KC349814 |
| <i>O. aff. smithi</i> 'Three Kings, Te<br>Paki, Western Northland' | OSM14  | FT601          | Great Island, Three Kings Islands                             | KC349805 |
|                                                                    | OSM31* | RE4833 (S1195) | Muriwai Beach, 30 km NW of Auckland                           | KC349812 |
| <i>O. stenotis</i>                                                 | OST1*  | FT2            | Mt Anglem, Stewart Island                                     | KC349823 |
|                                                                    | OST2   | FT289          | Table Hill, Stewart Island                                    | KC349824 |
| <i>O. striatum</i>                                                 | OSR1*  | FT3301         | Waipuku, Taranaki                                             | KC349821 |
|                                                                    | OSR2   | FT3296         | Little Barrier Island                                         | KC349822 |
| <i>O. suteri</i>                                                   | OSU1   | FT148          | Green Island, Mercury Islands                                 | KC349825 |
|                                                                    | OSU2   | FT602          | Great Island, Three Kings Islands                             | KC349831 |
|                                                                    | OSU3   | CD1027         | Aorangi Island, Poor Knights Islands                          | KC349832 |
|                                                                    | OSU4*  | FT158          | Middle Island, Mercury Islands                                | KC349833 |
|                                                                    | OSU5   | FT570          | Rumamahuea-iti, Alderman Islands                              | KC349834 |
|                                                                    | OSU6   | FT578          | Hen Island, Hen & Chickens Islands                            | KC349835 |
|                                                                    | OSU7   | FT624          | One, NW Hen & Chickens Islands                                | KC349836 |
|                                                                    | OSU8   | FT2493         | Ware Ware Island, NW Hen & Chickens Islands                   | KC349837 |

---

---

|                    |       |                |                                                        |          |
|--------------------|-------|----------------|--------------------------------------------------------|----------|
|                    | OSU9  | FT2496         | Muriwhenua Island, Hen & Chickens Islands              | KC349838 |
|                    | OSU10 | FT5494         | Green Island, Mercury Islands                          | KC349826 |
|                    | OSU11 | RE4819 (S1181) | Burgess Island, Mokohinau Islands                      | KC349827 |
|                    | OSU14 | RE4716 (S1077) | Flat Island, off Ohinau Island, Coromandel Peninsula   | KC349828 |
|                    | OSU15 | RE4587 (S947)  | Taupo Bay, Whangaroa Bay, Northland                    | KC349829 |
|                    | OSU16 | RE4583 (S943)  | Tapotupotu Bay, Northland                              | KC349830 |
|                    | OSM3  | CD850          | Muriwhenua Island, Hen & Chickens Islands              | KC349811 |
| <i>O. taumakae</i> | OBI2* | RE5237         | Taumaka, Open Bay Islands                              | KC349642 |
|                    | OBI3  | FT311          | Taumaka, Open Bay Islands                              | KC349643 |
| <i>O. tekakahu</i> | TEK1* | FT7650         | Chalky Island, Fiordland                               | KC349853 |
| <i>O. townsi</i>   | MOS1  | RE5917 (FT182) | Mokohinau Island                                       | KC349630 |
|                    | MOS2* | RE5918 (FT617) | Pupuha Island, Hen & Chicken Islands                   | KC349632 |
|                    | MOS3  | RE5916 (FT181) | Mokohinau Island                                       | KC349633 |
|                    | MOS4  | RE5921 (FT623) | Pupuha Island, Hen & Chicken Islands                   | KC349634 |
|                    | MOS5  | RE5919 (FT619) | Muriwhenua, Hen & Chicken Island                       | KC349635 |
|                    | MOS6  | RE5920 (FT621) | Muriwhenua, Hen & Chicken Island                       | KC349636 |
|                    | MOS7  | RE5922 (FT625) | Muriwhenua, Hen & Chicken Island                       | KC349637 |
|                    | MOS8  | RE5923 (FT626) | Unknown locality, Hen & Chickens Group                 | KC349638 |
|                    | MOS9  | RE4800 (S1162) | Stack 'H' W of Trig (Atihau) Island, Mokohinau Islands | KC349639 |
|                    | MOS10 | RE4801 (S1163) | Stack 'H' W of Trig (Atihau) Island, Mokohinau Islands | KC349631 |

---

---

|                              |       |                           |                                         |          |
|------------------------------|-------|---------------------------|-----------------------------------------|----------|
|                              | COL14 | —                         | Ahuriri Stream, Great Barrier Island    | KC349591 |
|                              | COL15 | —                         | Ahuriri Stream, Great Barrier Island    | KC349592 |
| <i>O. waimatense</i>         | OWA2  | CD1209                    | Wairau River, Marlborough               | KC349839 |
|                              | OWA5  | CD1214                    | Little Mt Ida, Otago                    | KC349840 |
|                              | OWA6  | FT3011                    | Rag and Famish Strm Valley, Marlborough | KC349841 |
|                              | OWA7* | FT3012                    | Black Jacks Island, Lake Benmore, Otago | KC349842 |
| <i>O. whitakeri</i>          | CWH1  | CD949                     | Pukerua Bay                             | KC349607 |
|                              | CWH2* | FT294                     | Middle Island, Mercury Islands          | KC349608 |
|                              | CWH3  | CD809                     | Middle Island, Mercury Islands          | KC349609 |
|                              | CWH4  | CD822                     | Middle Island, Mercury Islands          | KC349610 |
|                              | CWH5  | FT186                     | Pukerua Bay                             | KC349611 |
|                              | CWH6  | FT531                     | Middle Island, Mercury Islands          | KC349612 |
|                              | CWH7  | FT297                     | Castle Island                           | KC349613 |
| <i>O. zelandicum</i>         | OZE2  | FT6516                    | Pukerua Bay, Wellington                 | KC349843 |
|                              | OZE4* | CD331                     | Maud Island, Nelson/Marlborough         | KC349844 |
|                              | OZE7  | RE5337 (FT3743)           | Gentle Annie, West Coast                | KC349845 |
|                              | OZE9  | FT6525                    | Johnsonville, Wellington                | KC349846 |
| <i>O. lichenigerum</i>       | LIC1* | ABTC68934<br>(SAMAR52030) | Blackburn Island, Lord Howe Island      | KC349628 |
|                              | LIC2  | ABTC58889<br>(SAMAR52161) | Blackburn Island, Lord Howe Island      | KC349629 |
| <i>Nannoscincus mariei</i>   | EUG1  | NR9808                    | New Caledonia                           | KC349614 |
| <i>Marmorosphax tricolor</i> | EUG2  | NR9800                    | New Caledonia                           | KC349616 |

---

---

|                                |       |         |                       |          |
|--------------------------------|-------|---------|-----------------------|----------|
| <i>Caledoniscincus</i>         | EUG3  | EBU3522 | New Caledonia         | KC349617 |
| <i>austrocaledonicus</i>       |       |         |                       |          |
| <i>Lioscincus tillieri</i>     | EUG5  | NR3617  | Mt Mou, New Caledonia | KC349618 |
| <i>Lampropholis guichenoti</i> | EUG7  | NR2639  | Australia             | KC349619 |
| <i>Morethia adelaidensis</i>   | EUG10 | NR8560  | Australia             | KC349615 |

---
