# Supplementary material for: A Retrospective Approach to Testing the DNA Barcoding Method
Source: PubMed Central journal article supplement (PMC3823873; doi:10.1371/journal.pone.0077882), 2013-11-11
Supplement: pone.0077882.s003.pdf [file pone.0077882.s003.pdf]

**Table S3. Oligonucleotide primers used in this study to amplify and sequence COI in New Zealand skinks.**

| Gene       | Primer Name | Sequence (5'-3')              | 5' Position | Source         |
|------------|-------------|-------------------------------|-------------|----------------|
| <i>COI</i> | SkinkCOI-F1 | TTAACAGCTAARCACCCAATCCAGC     | 5093        | This study     |
|            | SkinkCOI-F3 | AATCGTTGATTCTTCTCAACCAACC     | 5297        | This study     |
|            | SkinkCOI-R2 | GGAAGGATAAGAATGTAGACTTCTGGGTG | 6005        | This study     |
|            | COIe        | CCAGAGATTAGAGGGAATCAGTG       | 6470        | Palumbi (1996) |

Values in '5' position' refer to the position of the 5' position in the complete *Plestiodon egregius* mtDNA sequence (Kumazawa & Nishida 1999).

## References

- Kumazawa Y, Nishida M, 1999. Complete mitochondrial DNA sequences of the green turtle and blue-tailed mole skink: statistical evidence for Archosaurian affinity of turtles. *Molecular Biology and Evolution* 16:784-792.
- Palumbi SR, 1996. Nucleic Acids II: The polymerase chain reaction. In: Hillis DM, Moritz C, Mable MK, editors. *Molecular Systematics* Sunderland: Sinauer Associates. p. 205-247.
