# Supplementary material for: A Retrospective Approach to Testing the DNA Barcoding Method
Source: PubMed Central journal article supplement (PMC3823873; doi:10.1371/journal.pone.0077882), 2013-11-11
Supplement: pone.0077882.s004.pdf [file pone.0077882.s004.pdf]

**Table S4. Query identification criteria for the Neighbour Joining-based and matching methods (modified from Meier et al. 2006).**

| <i>Method</i>                                    | <i>Identification Outcome</i>                                                                                                         |                                                                                                                                                                                                                                                  |                                                                                                                                    |
|--------------------------------------------------|---------------------------------------------------------------------------------------------------------------------------------------|--------------------------------------------------------------------------------------------------------------------------------------------------------------------------------------------------------------------------------------------------|------------------------------------------------------------------------------------------------------------------------------------|
|                                                  | Successful                                                                                                                            | Ambiguous/Unidentified                                                                                                                                                                                                                           | Failure/Mis-identification                                                                                                         |
| <b>Neighbour Joining-based, revised criteria</b> | Query in polytomy with conspecifics OR Query at least one node into a clade exclusively consisting of conspecifics                    | Query without a conspecific sequence in the dataset OR Query sister group to conspecifics OR Query in polytomy with at least one conspecific and one allospecific sequence                                                                       | Query at least one node into an allospecific clade OR Query in polytomy with only allospecific sequences                           |
| <b>“Best Match”</b>                              | Sequence(s) with smallest distance to query all conspecific                                                                           | Sequence(s) with smallest distance to query a mixture of allo- and conspecific sequences                                                                                                                                                         | All sequence(s) with smallest distance to query allospecific                                                                       |
| <b>“Best Close Match”</b>                        | Sequence(s) with smallest distance to query all conspecific and within the 95 <sup>th</sup> percentile of all intraspecific distances | Sequence(s) with smallest distance to query a mixture of allo- and conspecific sequences and within the 95 <sup>th</sup> percentile of all intraspecific distances OR No match within 95 <sup>th</sup> percentile of all intraspecific distances | All sequence(s) with smallest distance to query allospecific and within 95 <sup>th</sup> percentile of all intraspecific distances |
| <b>“All Species Barcode”</b>                     | As in “Best Match”, but with all conspecific sequences topping the list of best matches                                               | As in “Best Match”, but with at least one allospecific sequence being more similar to query than the least similar conspecific sequence                                                                                                          | Query with conspecific sequence in dataset is more similar to all sequences from another species                                   |

## **Reference**

Meier R, Shiyang K, Vaidya G, Ng PKL, 2006. DNA barcoding and taxonomy in Diptera: a tale of high intraspecific variability and low identification. *Systematic Biology* 55:715-726.
