# Supplementary material for: A Retrospective Approach to Testing the DNA Barcoding Method
Source: PubMed Central journal article supplement (PMC3823873; doi:10.1371/journal.pone.0077882), 2013-11-11
Supplement: pone.0077882.s005.pdf [file pone.0077882.s005.pdf]

**Table S5. Number of samples and geographic localities used in the DNA barcoding study of New Zealand skinks based on the 1977**

**taxonomy** (see Tables S1 and S2 for additional details). The level (mean  $\pm$  standard error [SE], and range) of intraspecific K2P genetic distances is shown for each New Zealand skink species. The sample codes (see Table S2) for the new discoveries since 1977 are indicated.

| Species                         | No. samples | No. geographic localities | Intraspecific genetic distance |            |
|---------------------------------|-------------|---------------------------|--------------------------------|------------|
|                                 |             |                           | Mean $\pm$ SE                  | Range      |
| <i>Cyclodina aenea</i>          | 13          | 10                        | 6.57 $\pm$ 0.62                | 0 – 13.9   |
| <i>Cyclodina alani</i>          | 6           | 4                         | 1.83 $\pm$ 0.31                | 0 – 4.3    |
| <i>Cyclodina macgregori</i>     | 2           | 1                         | 1.00 $\pm$ 0.36                | 1.0        |
| <i>Cyclodina oliveri</i>        | 23          | 10                        | 5.73 $\pm$ 0.06                | 0 – 10.4   |
| <i>Cyclodina ornata</i>         | 7           | 7                         | 4.47 $\pm$ 0.53                | 1.4 – 7.7  |
| <i>Cyclodina whitakeri</i>      | 7           | 3                         | 2.3 $\pm$ 0.11                 | 0 – 0.4    |
| <i>Leiopisma acrinasum</i>      | 2           | 2                         | 0.57 $\pm$ 0.26                | 0.6        |
| <i>Leiopisma chloronoton</i>    | 8           | 8                         | 8.20 $\pm$ 0.76                | 1.6 – 11.6 |
| <i>Leiopisma fallai</i>         | 2           | 1                         | 0                              | 0          |
| <i>Leiopisma grande</i>         | 1           | 1                         | —                              | —          |
| <i>Leiopisma homalonotum</i>    | 2           | 2                         | 0                              | 0          |
| <i>Leiopisma infrapunctatum</i> | 28          | 14                        | 3.24 $\pm$ 0.38                | 0 – 7.1    |
| <i>Leiopisma lineocellatum</i>  | 14          | 10                        | 7.47 $\pm$ 0.07                | 0 – 12.0   |

---

|                                              |    |    |              |           |
|----------------------------------------------|----|----|--------------|-----------|
| <i>Leiopisma moco</i>                        | 7  | 7  | 1.93 ± 0.03  | 0.1 – 4.7 |
| <i>Leiopisma nigriplantare nigriplantare</i> | 2  | 1  | 0.28 ± 0.18  | 0.3       |
| <i>Leiopisma nigriplantare maccanni</i>      | 82 | 66 | 13.31 ± 0.94 | 0 – 21.3  |
| <i>Leiopisma otagense</i> form otagense      | 4  | 2  | 3.93 ± 0.66  | 0 – 6.0   |
| <i>Leiopisma otagense</i> form waimatense    | 4  | 4  | 7.37 ± 0.89  | 0 – 11.0  |
| <i>Leiopisma smithi</i>                      | 19 | 19 | 2.63 ± 0.32  | 0 – 7.1   |
| <i>Leiopisma striatum</i>                    | 2  | 2  | 0.42 ± 0.24  | 0.4       |
| <i>Leiopisma suteri</i>                      | 15 | 13 | 0.12 ± 0.07  | 0 – 0.4   |
| <i>Leiopisma zelandicum</i>                  | 4  | 4  | 1.22 ± 0.33  | 0.6- 1.9  |
| <i>Leiopisma lichenigerum</i>                | 2  | 1  | 0.14 ± 0.13  | 0.1       |

#### **New Discoveries**

*Oligosoma pikitanga* (SVS1)

*Oligosoma taumakae* (OBI2-3)

*Oligosoma tekakahu* (TEK1)

*Oligosoma* aff. *infrapunctatum* ‘Chesterfield’ (OIF3-4, 13, 37-38)

*Oligosoma* aff *longipes* ‘Rangitata’ (RAN1-2)

#### **Suspected New Species- Not Validated**

*Oligosoma* aff *inconspicuum* ‘Big Bay’ (BBS1-7,9-11, 14-15)

*Oligosoma* aff *inconspicuum* ‘Barn Bay’ (BBS17)

*Oligosoma* aff *inconspicuum* ‘Cascade Plateau’

---

---

(BBS18-20)

*Oligosoma* aff *infrapunctatum* 'Paparoa' (PAP1)

*Oligosoma* aff *infrapunctatum* 'Denniston' (OIF5)

*Oligosoma* aff *maccanni* 'Garston' (OMA3-4)

*Oligosoma* aff *polychroma* 'Seaward Moss' (ONP4)

*Oligosoma* aff *polychroma* 'Grey Valley' (GVS1-8)

---
