# Supplementary material for: A Retrospective Approach to Testing the DNA Barcoding Method
Source: PubMed Central journal article supplement (PMC3823873; doi:10.1371/journal.pone.0077882), 2013-11-11
Supplement: pone.0077882.s006.pdf [file pone.0077882.s006.pdf]

**Table S6. Number of samples and geographic localities used in the DNA barcoding study of New Zealand skinks (genus *Oligosoma*)** (see Table S2 for additional details). The level (mean  $\pm$  standard error [SE], and range) of intraspecific K2P genetic distances in each New Zealand skink species. The taxonomy follows the current New Zealand Threat Classification listing (Hitchmough et al. 2010).

| Species                                                             | No. samples | No. geographic localities | Intraspecific genetic distance |            |
|---------------------------------------------------------------------|-------------|---------------------------|--------------------------------|------------|
|                                                                     |             |                           | Mean $\pm$ SE                  | Range      |
| <i>Oligosoma acrinasum</i>                                          | 2           | 2                         | 0.57 $\pm$ 0.26                | 0.6        |
| <i>Oligosoma aeneum</i>                                             | 10          | 8                         | 2.29 $\pm$ 0.36                | 0 – 5.0    |
| <i>Oligosoma alani</i>                                              | 6           | 4                         | 1.83 $\pm$ 0.31                | 0 – 4.3    |
| <i>Oligosoma chloronoton</i>                                        | 5           | 5                         | 6.88 $\pm$ 0.74                | 1.6 – 10.7 |
| <i>Oligosoma</i> aff. <i>choronoton</i> ‘West Otago’                | 3           | 3                         | 1.82 $\pm$ 0.04                | 1.0 – 2.5  |
| <i>Oligosoma fallai</i>                                             | 2           | 1                         | 0                              | 0          |
| <i>Oligosoma grande</i>                                             | 1           | 1                         | —                              | —          |
| <i>Oligosoma hardyi</i>                                             | 2           | 1                         | 0.28 $\pm$ 0.19                | 0.3        |
| <i>Oligosoma homalonotum</i>                                        | 2           | 2                         | 0                              | 0          |
| <i>Oligosoma inconspicuum</i>                                       | 19          | 6                         | 2.65 $\pm$ 0.35                | 0 – 5.3    |
| <i>Oligosoma infrapunctatum</i>                                     | 23          | 13                        | 2.01 $\pm$ 0.27                | 0 – 5.9    |
| <i>Oligosoma</i> aff. <i>infrapunctatum</i> ‘Chesterfield’          | 5           | 2                         | 0.69 $\pm$ 0.21                | 0 – 1.7    |
| <i>Oligosoma</i> aff. <i>infrapunctatum</i> ‘Southern North Island’ | 7           | 3                         | 0.99 $\pm$ 0.02                | 0 – 2.9    |

---

|                                                                 |    |    |             |           |
|-----------------------------------------------------------------|----|----|-------------|-----------|
| <i>Oligosoma levidensum</i>                                     | 1  | 1  | —           | —         |
| <i>Oligosoma lineocellatum</i>                                  | 7  | 6  | 4.44 ± 0.58 | 0 – 6.3   |
| <i>Oligosoma</i> aff. <i>lineocellatum</i> ‘South Marlborough’  | 1  | 1  | —           | —         |
| <i>Oligosoma</i> aff. <i>lineocellatum</i> ‘Mackenzie Basin’    | 4  | 1  | 0.07 ± 0.07 | 0 – 0.1   |
| <i>Oligosoma</i> aff. <i>lineocellatum</i> ‘Central Canterbury’ | 2  | 2  | 1.14 ± 0.38 | 1.1       |
| <i>Oligosoma longipes</i>                                       | 2  | 1  | 0           | 0         |
| <i>Oligosoma</i> aff. <i>longipes</i> ‘Southern’                | 4  | 2  | 1.64 ± 0.39 | 0 – 2.5   |
| <i>Oligosoma</i> aff. <i>longipes</i> ‘Rangitata’               | 2  | 1  | 0           | 0         |
| <i>Oligosoma maccanni</i>                                       | 27 | 23 | 4.54 ± 0.47 | 0 – 7.1   |
| <i>Oligosoma macgregori</i>                                     | 2  | 1  | 1.00 ± 0.36 | 1.0       |
| <i>Oligosoma microlepis</i>                                     | 2  | 2  | 0.28 ± 0.02 | 0.3       |
| <i>Oligosoma moco</i>                                           | 7  | 7  | 1.93 ± 0.03 | 0.1 – 4.7 |
| <i>Oligosoma nigriplantare</i>                                  | 2  | 1  | 0.28 ± 0.18 | 0.3       |
| <i>Oligosoma notosaurus</i>                                     | 2  | 2  | 1.29 ± 0.04 | 1.3       |
| <i>Oligosoma oliveri</i>                                        | 11 | 4  | 1.01 ± 0.22 | 0 – 2.2   |
| <i>Oligosoma ornatum</i>                                        | 6  | 6  | 3.36 ± 0.46 | 1.4 – 4.8 |
| <i>Oligosoma</i> aff. <i>ornatum</i> ‘Poor Knights Islands’     | 1  | 1  | —           | —         |
| <i>Oligosoma otagense</i>                                       | 4  | 2  | 3.93 ± 0.66 | 0 – 6.0   |
| <i>Oligosoma pikitanga</i>                                      | 1  | 1  | —           | —         |
| <i>Oligosoma polychroma</i>                                     | 24 | 19 | 2.63 ± 0.36 | 0 – 5.5   |
| <i>Oligosoma</i> aff. <i>polychroma</i> ‘Clade 3’               | 1  | 1  | —           | —         |
| <i>Oligosoma</i> aff. <i>polychroma</i> ‘Clade 4’               | 4  | 4  | 5.06 ± 0.61 | 3.7 – 5.8 |

---

|                                                                               |    |    |             |          |
|-------------------------------------------------------------------------------|----|----|-------------|----------|
| <i>Oligosoma</i> aff. <i>polychroma</i> ‘Clade 5’                             | 22 | 17 | 2.19 ± 0.32 | 0 – 4.6  |
| <i>Oligosoma smithi</i>                                                       | 17 | 17 | 1.62 ± 0.25 | 0 – 4.1  |
| <i>Oligosoma</i> aff. <i>smithi</i> ‘Three Kings, Te Pahi, Western Northland’ | 2  | 2  | 3.8 ± 0.75  | 3.8      |
| <i>Oligosoma stenotis</i>                                                     | 2  | 2  | 2.16 ± 0.54 | 2.2      |
| <i>Oligosoma striatum</i>                                                     | 2  | 2  | 0.42 ± 0.24 | 0.4      |
| <i>Oligosoma suteri</i>                                                       | 15 | 13 | 0.12 ± 0.07 | 0 – 0.4  |
| <i>Oligosoma taumakae</i>                                                     | 2  | 1  | 0           | 0        |
| <i>Oligosoma tekakahu</i>                                                     | 1  | 1  | —           | —        |
| <i>Oligosoma townsi</i>                                                       | 12 | 6  | 2.75 ± 0.42 | 0 – 5.0  |
| <i>Oligosoma waimatense</i>                                                   | 4  | 4  | 7.37 ± 0.89 | 0 – 11.0 |
| <i>Oligosoma whitakeri</i>                                                    | 7  | 3  | 2.3 ± 0.11  | 0 – 0.4  |
| <i>Oligosoma zelandicum</i>                                                   | 4  | 4  | 1.22 ± 0.33 | 0.6- 1.9 |
| <i>Oligosoma lichenigerum</i>                                                 | 2  | 1  | 0.14 ± 0.13 | 0.1      |

## Reference

Hitchmough RA, Hoare JM, Jamieson H, Newman DG, Tocher MD, Anderson PJ, Lettink M, Whitaker AH, 2010. Conservation status of New Zealand reptiles, 2009. *New Zealand Journal of Zoology* 37:203-224.
